# Supplementary material
Source: PubMed Central journal article supplement (PMC4248742)
Supplement: MCB.00791-14_zmb999100653so1.pdf [file MCB.00791-14_zmb999100653so1.pdf]

**Supplementary information for**

# **CstF64: cell cycle regulation and functional role in 3' end processing of replication-dependent histone mRNAs**

---

**Valentina Romeo<sup>1,2</sup>, Esther Griesbach<sup>1</sup>, Daniel Schümperli<sup>1,\*</sup>**

<sup>1</sup>Institute of Cell, Biology, University of Bern, 3012 Bern, Switzerland; <sup>2</sup>Graduate School for Cellular and Biomedical Sciences, University of Bern, 3012 Bern, Switzerland

\*Corresponding author. Tel: +41 31 631 4675; Fax: +41 31 631 4431; E-mail:  
daniel.schuemperli@izb.unibe.ch

## **Content:**

**Supplementary figures S1-S6 (pp. 2-7)**

**References (p. 8)**

**Supplementary tables S1-S3 (pp. 9-11)**

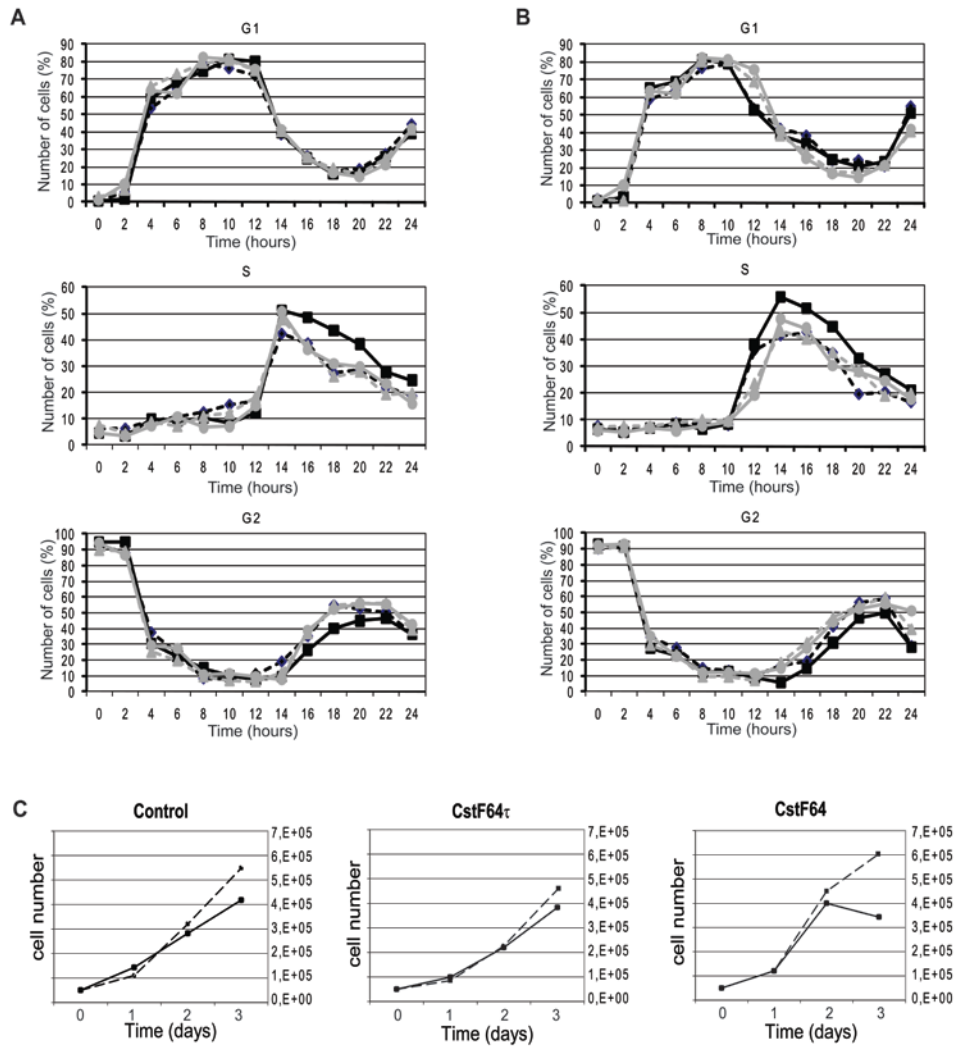

**Supplementary Figure S1: CstF64 depletion impairs cell cycle progression and proliferation.**

**(A-B)** Biological replicates of cell cycle experiment performed in Figure 2A. HeLa cell lines carrying doxycyclin-inducible shRNA expression cassettes for the depletion of either CstF64 or CstF64t were generated by lentiviral transduction. After induction of shRNA expression by doxycyclin, the cells were arrested in G2/M by nocodazole treatment. After release, the cell cycle progression was monitored by flow cytometry (PI DNA staining) and compared with identically synchronised doxycyclin-free cells. The three panels from top to bottom show the subpopulations of G1, S and G2 phase cells. Shown in grey are cells containing shCstF64t without (triangles, dashed lines) or with doxycyclin induction (discs, solid lines). Cells containing shCstF64 without (diamonds, dashed lines) or with doxycyclin induction (squares, solid lines) are shown in black. Note that CstF64 depletion appears to delay passage through S phase, resulting in an accumulation of cells in S and delayed entry into G2. **(C)** Growth curves (cumulative cell counting) of HeLa cells depleted of CstF64 (right panel) or CstF64t (middle) by doxycycline induction of shRNAs (solid lines), compared to their controls without shRNA induction (dashed lines). As additional control, HeLa cells with inducible depletion of TCR $\beta$  were included (left panel). Cells were seeded in equal numbers, and depletion was induced on day 1. CstF64-depleted cells showed a growth defect after the second day of depletion (right panel, solid line).

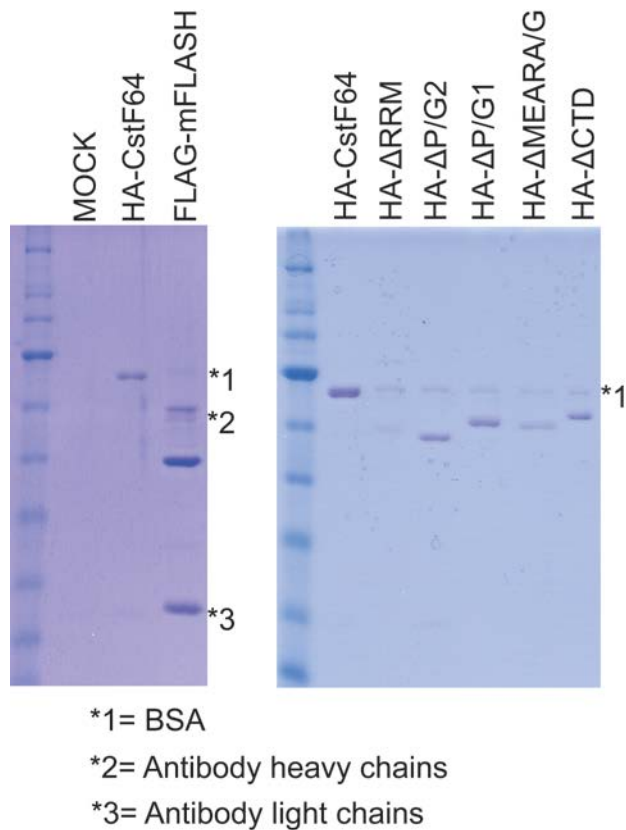

**Supplementary Figure S2: Quality control of recombinant proteins used for *in vitro* interaction assays.**

Plasmids encoding either a FLAG-tagged version of mFLASH (a minimal 314 amino acids domain of FLASH that is functional in histone RNA processing (1, 2) or HA-tagged versions of wild-type or mutant CstF64 were singularly transfected into HEK293T cells. The transfected cells were synchronised in S phase with aphidicolin and harvested 4 hrs after release of the block. mFLASH-FLAG as well as HA-CstF64 full length and deletion mutants were purified by immunoprecipitation under stringent conditions. The obtained proteins were tested by SDS-PAGE and Coomassie staining to verify the absence of contaminants that might interfere with the subsequent assay. Notably, also a Western blot analysis was performed to verify that the band labelled as \*1 is not endogenous CstF64 or CstF64 $\tau$ .

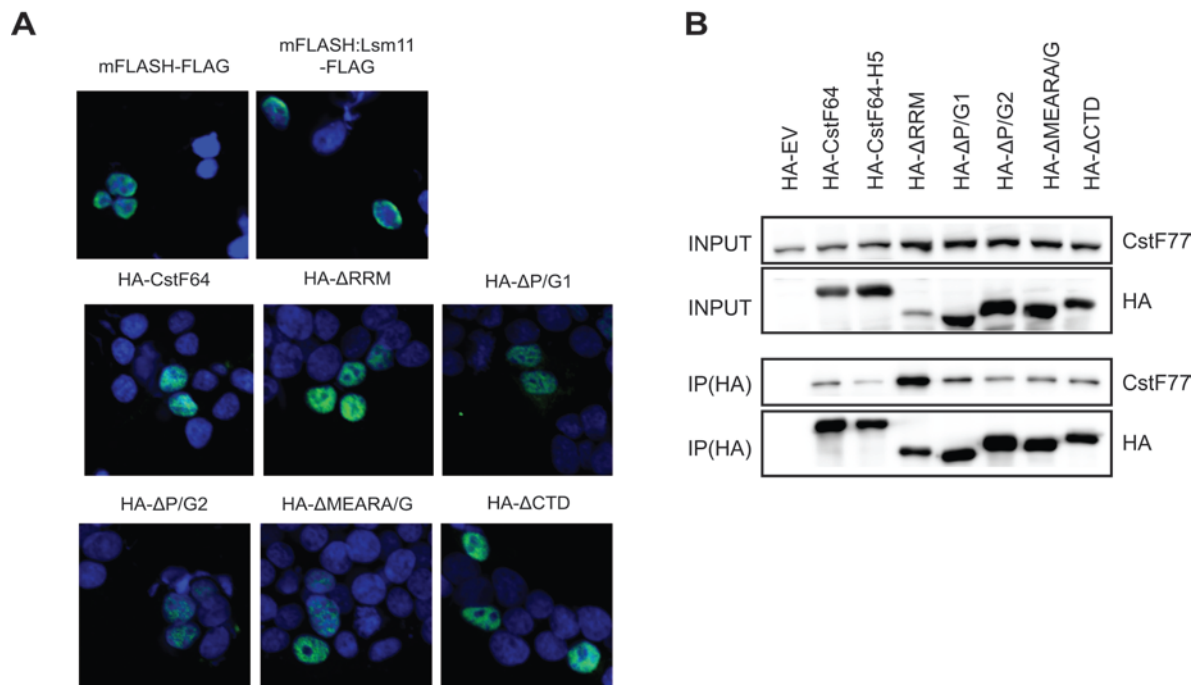

**Supplementary Figure S3: Subcellular localization of HA-CstF64 deletion mutants.**

**(A)** Expression and nuclear localisation of recombinant proteins used for interaction studies. Immunofluorescence staining of HeLa cells transiently transfected with HA-tagged CstF64 mutants or FLAG-tagged FLASH or FLASH:Lsm11. Briefly: 0.5  $\mu$ g DNA was transfected into HeLa cells previously seeded on glass coverslips. 24 hours post-transfection cells were fixed with 3% paraformaldehyde solution, stained with rabbit anti-HA sc-805 or anti-OCTA probe sc-807 (as reported in Supplementary Table S3). Secondary antibody donkey anti-rabbit AlexaFluor 488 (Invitrogen) was then applied. Images were analysed with OLYMPUS Fluoview 1000-BX61 (OLYMPUS-Tokio). Scale bar 10 $\mu$ m. **(B)** Western blot analysis of immunoprecipitated material showing interactions between CstF64 mutants and endogenous CstF77. HeLa cells transfected with HA-tagged forms of CstF64 were synchronised in S phase by aphidicolin treatment and harvested in S phase. Whole cell lysate was immunoprecipitated with anti-HA-coated magnetic beads. INPUT (10% of total) and immunoprecipitated material (IP) were probed by Western blot with anti-CstF77 (Bethyl A301-096A) and anti-HA (sc-805).

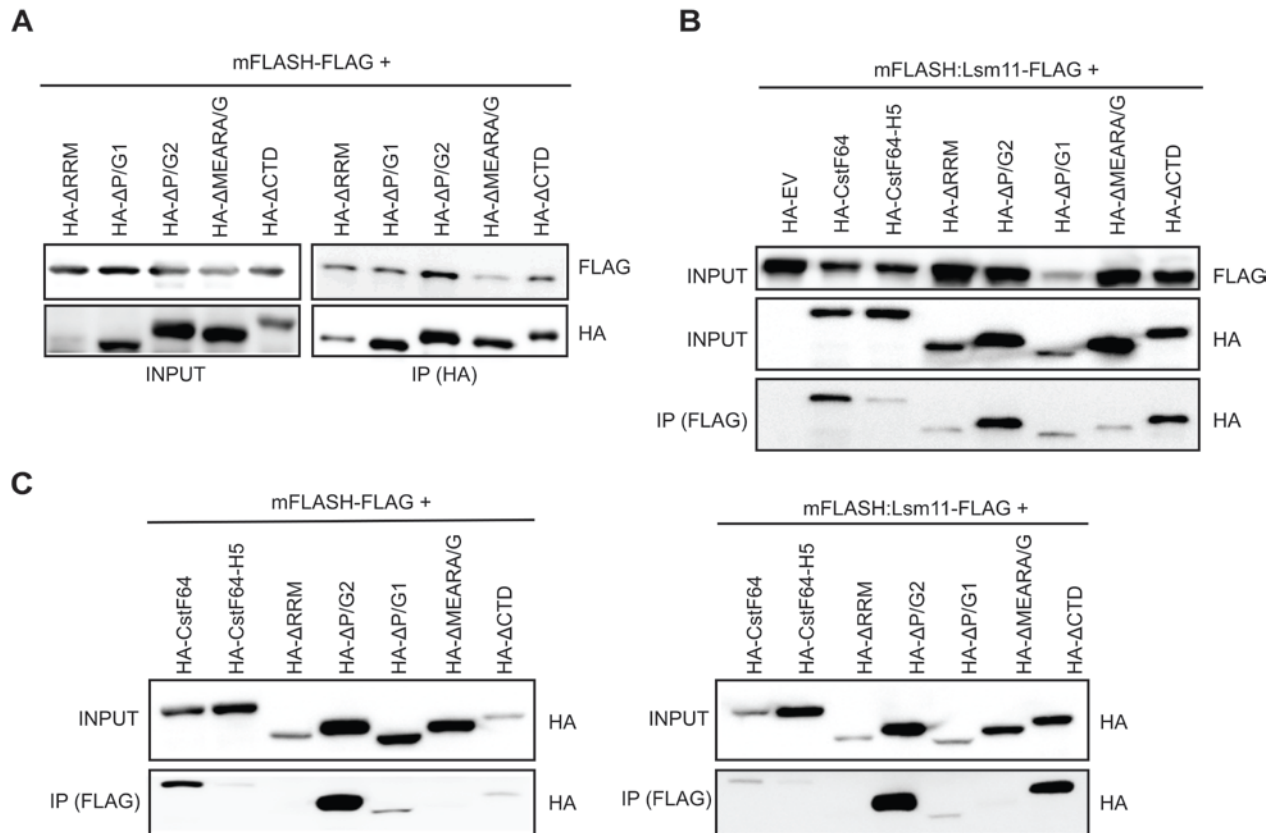

**Supplementary Figure S4: Mapping CstF64 interactions with mFLASH or mFLASH:Lsm11.**

**(A)** Association of mFLASH-FLAG with wild-type or mutant CstF64 *in vivo*. Inversely as in Figure 4D of the main paper, lysates from cells transfected with pairwise combinations of expression constructs were subjected to immunoprecipitation with HA-coated magnetic beads. Western blots from INPUT samples (10% of the total) were probed with anti-HA and anti-FLAG antibodies to show expression of the various proteins. The immunoprecipitated material (IP) was analysed in the same way. **(B)** Association of mFLASH:Lsm11-FLAG with wild-type or mutant CstF64. HeLa cells were co-transfected with mutant forms of CstF64 and FLAG-tagged fusions of a minimal FLASH fragment with the N-terminus of Lsm11 (see main text and Materials and Methods for details). Cell lysates were immunoprecipitated with anti-FLAG-coated magnetic beads. Protein expression in INPUT (10% of the total) and immunoprecipitated material (IP) was analysed by Western blot, by probing with anti-HA and anti-FLAG antibodies. **(C)** Analysis of the association of mFLASH-FLAG and mFLASH:Lsm11-FLAG with wild-type or mutant CstF64 in presence of 200 $\mu$ g/mL RNaseA. Western blots were probed with anti-HA antibody as described for panel B.

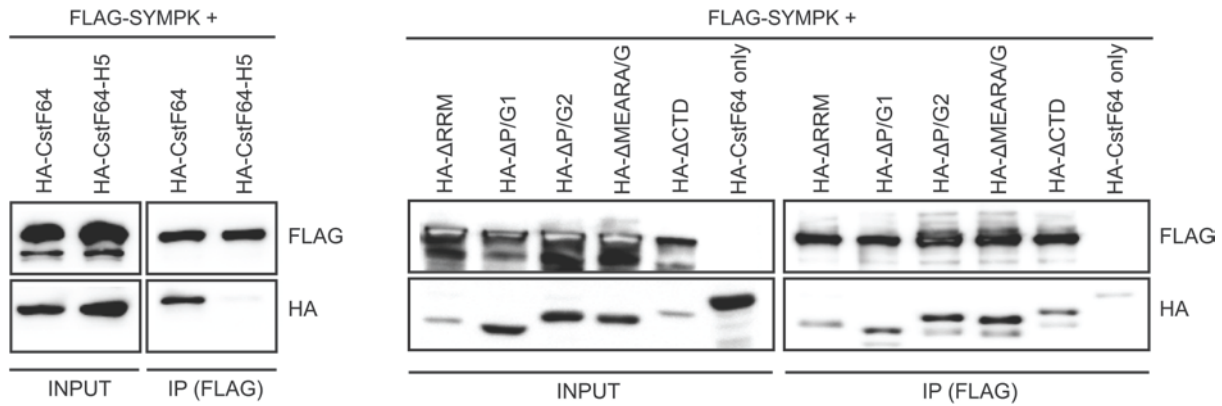

**Supplementary Figure S5: Analysis of interactions of symplekin with CstF64 mutants.**

Association of HA-tagged mutant forms of CstF64 with FLAG-symplekin *in vivo*. Lysates from cells transfected with pairwise combinations of expression constructs were subjected to immunoprecipitation with anti-FLAG-coated magnetic beads. INPUT (10%) and IP material were probed by Western blot with anti-HA and anti-FLAG antibodies. Left panel: control co-transfection of FLAG-symplekin and either wild-type CstF64 or the hinge helix 5 mutant. Right panel: co-transfection of FLAG-symplekin with HA-tagged CstF64 deletion mutants.

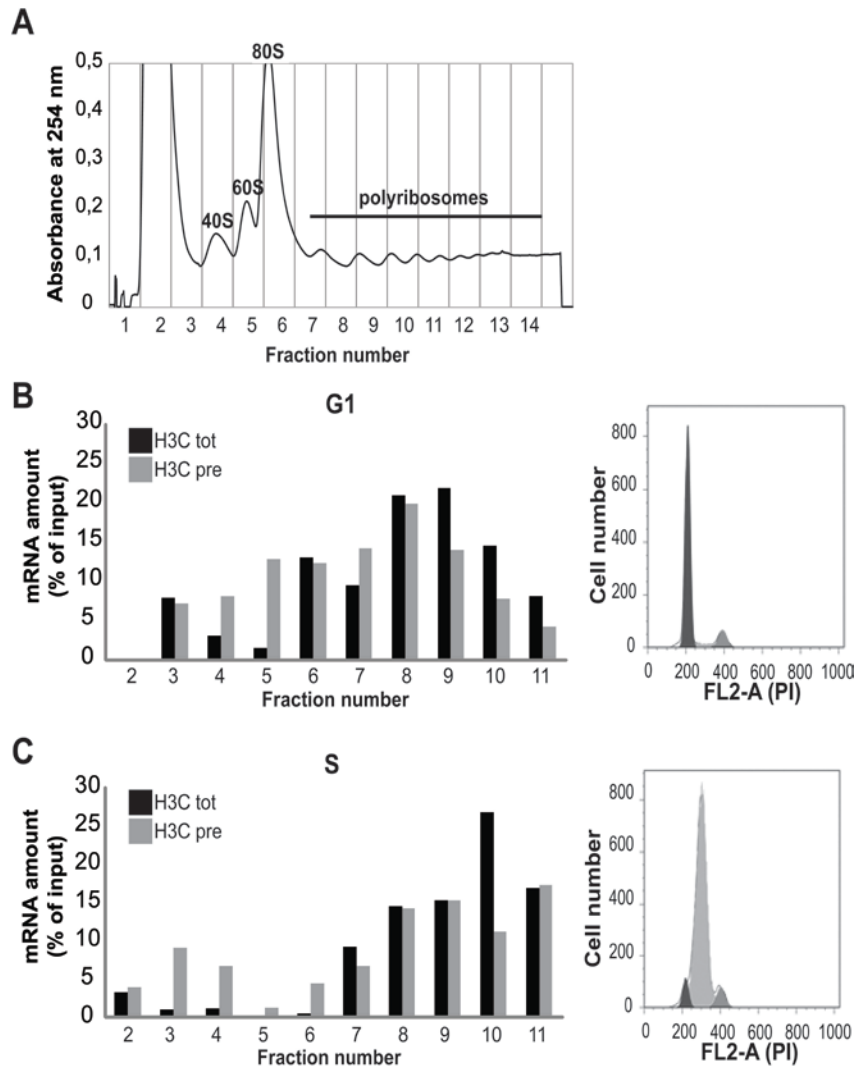

**Supplementary Figure S6: H3C precursor and total RNA profiles in sucrose gradients for G1 and S phase synchronised HeLa cells.**

Extracts from G1 and S phase-synchronised HeLa cells were analysed by centrifugation on linear 15%-45% sucrose gradients. H3C precursor and total transcripts were measured over the fractions collected. **(A)** Exemplary UV absorption profile of the used sucrose gradients: fractions 1 to 6 represent pre-polysome fractions, from fraction 7 onwards polysomes are present. **(B)** Gradient distribution of H3C precursor (pre, grey bars) and total (tot, black bars) transcripts in G1 phase-synchronised HeLa cells. G1-synchronised cells were obtained by nocodazole block and collected 8 hours post-release. **(C)** Gradient distribution of H3C precursor and total transcripts in S phase-synchronised HeLa cells. S phase synchronisation was achieved by aphidicolin block, and cells were collected 4 hours after release. B and C right panels show cytofluorometric analyses of the DNA content as detected by propidium iodide staining.

## References

1. **Burch, B. D., A. C. Godfrey, P. Y. Gasdaska, H. R. Salzler, R. J. Duronio, W. F. Marzluff, and Z. Dominski.** 2011. Interaction between FLASH and Lsm11 is essential for histone pre-mRNA processing in vivo in *Drosophila*. *RNA* **17**:1132-1147.
2. **Yang, X. C., B. Xu, I. Sabath, L. Kunduru, B. D. Burch, W. F. Marzluff, and Z. Dominski.** 2011. FLASH is required for the endonucleolytic cleavage of histone pre-mRNAs but is dispensable for the 5' exonucleolytic degradation of the downstream cleavage product. *Molecular and Cellular Biology* **31**:1492-1502.



**Supplementary Table S1: shRNAs**

| Name      | Target mRNA         | Comments                                                              |
|-----------|---------------------|-----------------------------------------------------------------------|
| CstF64-1  | CSTF2 NM_001325.2   | Ruepp et al., 2011                                                    |
| CstF64-2  | CSTF2 NM_001325.2   | Ruepp et al., 2011                                                    |
| CstF64T-1 | CSTF2T NM_015235.2  | Ruepp et al., 2011                                                    |
| CstF64T-2 | CSTF2T NM_015235.2  | Ruepp et al., 2011                                                    |
| scrambled | No target           | Ruepp MD. Sequence: AGGUAGUGUAAUCGCCUUGdtdt                           |
| Rrp44     | DIS3 NM_001128226.2 | kindly provided by Dr. P. Nicholson (Mühlemann Group, Eberle A. 2007) |

**Supplementary Table S2: Primers and Probes**

| Name                                        | Sequence                          | Target sequence      | Amplicon (bp) | Comments      |
|---------------------------------------------|-----------------------------------|----------------------|---------------|---------------|
| H3 pre <i>TaqMan</i> probe                  | FAM-CACCCACATCAGCACTT-TAMRA       | HIST2H3C NM_021059.2 |               | <i>TaqMan</i> |
| H3 pre forward primer                       | TTCCATCGTATCCAAAAGGCTCTT          | HIST2H3C NM_021059.2 | 69            | <i>TaqMan</i> |
| H3 pre reverse primer                       | CAAGCGGTACAGCTTCTTCC              | HIST2H3C NM_021059.2 |               | <i>TaqMan</i> |
| H3 tot <i>TaqMan</i> probe                  | FAM-TCGCTATGGCCCGTACTAA-TAMRA     | HIST2H3C NM_021059.2 |               | <i>TaqMan</i> |
| H3 tot forward primer                       | GCTGGTAAGCCTGTGTTTTGG             | HIST2H3C NM_021059.2 | 69            | <i>TaqMan</i> |
| H3 tot reverse primer                       | GCCGCCGGTCGACTT                   | HIST2H3C NM_021059.2 |               | <i>TaqMan</i> |
| b-Actin pre <i>TaqMan</i> probe             | ACTTGGCCTCATTTTTAAGG              | ACTB NM_001101.3     |               | <i>TaqMan</i> |
| b-Actin pre forward primer                  | GTACTGACTTGAGACCAGTTGAA           | ACTB NM_001101.3     | 79            | <i>TaqMan</i> |
| b-Actin pre reverse primer                  | CCCAGCCACACCACAAAGT               | ACTB NM_001101.3     |               | <i>TaqMan</i> |
| b-Actin tot <i>TaqMan</i> probe and primers | Applied Biosystems: Hs99999903_m1 | ACTB NM_001101.3     |               | <i>TaqMan</i> |
| SybrCstF2-Fw                                | CCACTGGAGCACCTTGATAG              | CSTF2 NM_001325.2    | 131           | SYBR          |
| SybrCstF2-Rev                               | CCACCTGGCACTGATTTG                | CSTF2 NM_001325.2    |               | SYBR          |
| qhCSTF2T_fw                                 | GGAATAATCAAGGCCAGGT               | CSTF2T NM_015235.2   | 102           | SYBR          |
| qhCSTF2T_rv                                 | GACTAAATGGCTGTATTCCATGC           | CSTF2T NM_015235.2   |               | SYBR          |
| DIS3_RTPCR_Fw                               | AGCAGGGAAAATTACTTGGAAGC           | DIS3 NM_001128226.2  | 128           | SYBR          |
| DIS3_RTPCR_Rev                              | AGCTCCACAGCCACAATATCT             | DIS3 NM_001128226.2  |               | SYBR          |

**Supplementary Table S3: Antibodies**

| <b>Name</b>       | <b>Code</b> | <b>Provider</b>         | <b>Dilution used</b> | <b>Host</b> |
|-------------------|-------------|-------------------------|----------------------|-------------|
| CstF64/CstF64T    | sc-28201    | SantaCruz Biotechnology | 1:1000               | Rabbit      |
| CstF77            | A301-096A   | Bethyl                  | 1:5000               | Rabbit      |
| CPSF2 (CPSF100)   | sc-165983   | SantaCruz Biotechnology | 1:1000               | Mouse       |
| CPSF73            | A301-091A   | Bethyl                  | 1:3000               | Rabbit      |
| SYMPK             | A301-465A   | Bethyl                  | 1:3000               | Rabbit      |
| $\beta$ -Actin    | A 5060      | Sigma-Aldrich           | 1:5000               | Rabbit      |
| Lamin A/C         | sc-7293     | SantaCruz Biotechnology | 1:3000               | Mouse       |
| $\alpha$ -Tubulin | T-5168      | Sigma-Aldrich           | 1:5000               | Mouse       |
| HA                | sc-805      | SantaCruz Biotechnology | 1:1000               | Rabbit      |
| OCTA probe (FLAG) | sc-807      | SantaCruz Biotechnology | 1:1000               | Rabbit      |
| anti-Rabbit-HRP   | sc-2004     | SantaCruz Biotechnology | 1:5000-10000         | Goat        |
| anti-Mouse-HRP    | sc-2005     | SantaCruz Biotechnology | 1:5000-10000         | Goat        |
